# Supplementary material for: Applying a Random Encounter Model to Estimate the Asiatic Black Bear (Ursus thibetanus) Density from Camera Traps in the Hindu Raj Mountains, Pakistan
Source: MDPI journal article supplement (doi:10.3390/biology13050341), 2024-05-14
Supplement: s1 [file s1]

# Section S1

## R code for calculating Activity Level

```
# R code to estimate wildlife activity patterns and activity levels from camera

# trap data

# Working directory

# This will open an explorer window for easy browsing

setwd(choose.dir())

# Import the .txt table into R when the data are separated by ";"

# Load data frame

data_activity <- read.table("Data.txt", sep = ";", dec=".", header=TRUE, as.is=TRUE) #
data frame

# Data frame structure:

# N_ind: Number of individuals recorded

# Time: Time (HH:MM:SS format) when animals were recorded

#install.packages ("activity") # just in case you didn't install the package previously

library(activity) # load package

# Replicating each sequence based on the number of animals recorded

data_activity.r <- data_activity[rep(row.names(data_activity), data_activity$N_ind), 1:2]

# Convert time of data to a numeric vector of radian time-of-day

data_activity.r$radtime <- gettime(data_activity.r$Time, "%H:%M:%S", "proportion")

radtime <- 2*pi*gettime(data_activity.r$Time, "%H:%M:%S", "proportion")

# fit activity model

actmod <- fitact(radtime, sample="data")

# plot activity pattern
```

```
plot(actmod)

# activity level

actmod@act

legend('topleft', c("Activity level = 0.41(0.27-0.55), SE = 0.071"), col=c("black", "blue"),
bty='n')

#Add sunrise and sunset time of your study area

abline(v=c(5, (18.5) - 24), col=c("blue"), lty=5)

abline(v=c(7, (17.5) - 24), col=c("blue"), lty=5)

abline(v=c(19, (18.5) - 24), col=c("blue"), lty=5)

abline(v=c(17, (18.5) - 24), col=c("blue"), lty=5)

abline(v=c(6.5, 17+30/60), lty=5)
```

## Section S2

### Variance associated with encounter rate

NONPARAMETRIC BOOTSTRAP

```
Call:
boot(data = data, statistic = statistic_function, R = 10000)
```

```
Bootstrap Statistics :
      original      bias    std. error
t1* 0.1433478 -0.0002126522 0.03199916
> # Estimate the variance of the encounter rate
> bootstrap_variance <- var(bootstrap_results$t)
> cat("Estimated variance of the encounter rate:", bootstrap_variance, "\n")
Estimated variance of the encounter rate: 0.001023946
```

### Variance associated with Radius and Angle

NONPARAMETRIC BOOTSTRAP

```
Call:
boot(data = data, statistic = statistic_function_radius, R = 10000)
```

```
Bootstrap Statistics:
      original      bias    std. error
t1* 0.004518116 -1.746014e-06 0.0002502456
> # Print the bootstrap results for angle
> print(bootstrap_results_angle)
```

NONPARAMETRIC BOOTSTRAP

```
Call:
boot(data = data, statistic = statistic_function_angle, R = 10000)
```

```
Bootstrap Statistics :
      original      bias    std. error
t1* 0.4264674 -0.0001045181 0.02925566
> # Estimate and print the variance for the radius
> bootstrap_variance_radius <- var(bootstrap_results_radius$t)
> cat("Estimated variance of the detection radius:", bootstrap_variance_radius, "\n")
Estimated variance of the detection radius: 6.262285e-08
> # Estimate and print the variance for the angle
> bootstrap_variance_angle <- var(bootstrap_results_angle$t)
> cat("Estimated variance of the detection angle:", bootstrap_variance_angle, "\n")
Estimated variance of the detection angle: 0.0008558938
```

## Variance associated with Speed

NONPARAMETRIC BOOTSTRAP

Call:

```
boot(data = data, statistic = statistic_function_speed, R = 10000)
```

Bootstrap Statistics :

|     | original | bias         | std. error |
|-----|----------|--------------|------------|
| t1* | 2.174182 | 0.0002983636 | 0.2284915  |

```
> # Estimate and print the variance for the speed
```

```
> bootstrap_variance_speed <- var(bootstrap_results_speed$t)
```

```
> cat("Estimated variance of the speed:", bootstrap_variance_speed, "\n")
```

Estimated variance of the speed: 0.05220835

## Section S3

### Variance associated with day range calculations and Density calculations along with its variance.

Let's use the delta method with partial derivatives to calculate the variance of the day range ( $D$ ) which is a function of the activity level ( $a$ ) and speed ( $s$ ). The day range  $D$  is given by:

Given:

- Activity level ( $a$ ): mean =  $0.41 \times 24 = 9.84$ , SE = 1.706
- Speed ( $s$ ): mean = 2.17, Variance = 0.05
- We can convert the standard errors to variances:

$$Var(a) = (SE(a))^2 = (1.706)^2$$

$$D = a \times s$$

The partial derivatives are:

With respect to  $a$ :

$$\partial D / \partial a = s$$

With respect to  $s$ :

$$\partial D / \partial s = a$$

Using the delta method formula for the variance of a function of independent variables:

$$Var(D) = (\partial D / \partial a)^2 Var(a) + (\partial D / \partial s)^2 Var(s)$$

Plugging in the partial derivatives and the variances of  $a$  and  $s$ :

$$\begin{aligned}\text{Var}(D) &= (s)^2 \text{Var}(a) + (a)^2 \text{Var}(s) = (2.17)^2 \times (1.706)^2 + (9.84)^2 \times (0.05) \\ &= 4.7089 \times 2.910436 + 96.8064 \times 0.051984 \\ &= 13.706484644 + 5.032384256\end{aligned}$$

$$\text{Var}(D) = 18.7388689$$

So, the variance of the day range ( $D$ ) using the delta method is 18.74. To find the standard error of the day range, we would take the square root of the variance:

$$\text{SE}(D) = \sqrt{\text{Var}(D)} = \sqrt{18.74} = 4.33$$

### Day range

$$V = 21.39 \text{ km/day} \pm 4.33 \text{ km/day}$$

### Density calculation

- Encounter rate ( $y/t$ ): 0.1433478.
- Day range ( $v$ ): 21.39395 km/day.
- Effective radius ( $r$ ): 0.004518116 km.
- Angle of the camera detection zone ( $\theta$ ): 0.4264674 radians.

$$D = y/t \times \pi/v \times r \times (2 + \theta)$$

Using REM equation:

$$D = 0.1433478 \times \pi/21.39395 \times 0.004518116 \times (2 + 0.4264674)$$

The calculated density ( $D$ ) is **1.8752** individuals per square kilometer.

**Given the values for the parameters:**

$$\text{Var}(y/t) = 0.001023946$$

$$\text{Var}(v) = 18.74 \text{ km}^2/\text{day}^2$$

$$\text{Var}(r) = 6.262285 \times 10^{-8} \text{ km}^2$$

$$\text{Var}(\theta) = 0.0008558938 \text{ radians}^2$$

- **Encounter rate ( $y/t$ ): 0.004518116.**
- **Day range ( $v$ ): 21.39 km/day**

- **Radius ( $r$ ): 0.004518116 km**
- **Angle ( $\theta$ ): 0.4264674 radians.**

We can now evaluate the partial derivatives at these values:

**With respect to  $y/t$ :**

$$\partial D / \partial (y/t) = \pi / 21.39 \times 0.004518116 \times (2 + 0.4264674) = 5.8107$$

**With respect to  $v$ :**

$$\begin{aligned} \partial D / \partial v &= -0.004518116 \times \pi / (21.39)^2 \times 0.004518116 \times (2 + 0.4264674) \\ &= -0.00013539 \end{aligned}$$

**With respect to  $r$ :**

$$\partial D / \partial r = -0.004518116 \times \pi / 21.39 \times (0.004518116)^2 \times (2 + 0.4264674) = -5.8107$$

**With respect to  $\theta$ :**

$$\partial D / \partial \theta = -0.004518116 \times \pi / 21.39 \times 0.004518116 \times (2 + 0.4264674)^2 = -0.009109$$

Now, we can plug in these partial derivatives and the variances into the formula for  $\text{Var}(D)$

$$\begin{aligned} \text{Var}(D) &= 2 \times 0.001023946 + (-0.00013539)^2 \times 18.74 + (-5.8107)^2 \times 6.262285 \times 10^{-8} \\ &\quad + (-0.009109)^2 \times 0.0008558938 \\ &= 0.03453 + 5.30 \times 10^{-8} + 2.12 \times 10^{-6} + 7.09 \times 10^{-8} \\ \text{Var}(D) &= 0.03453 \end{aligned}$$

So, the variance of the density  $D$  is 0.03453 individuals<sup>2</sup>/km<sup>4</sup>. The standard error of  $D$  would be the square root of the variance:

$$SE(D) = \sqrt{0.03453} = 0.1858 \text{ individuals/km}^2$$

Therefore, the standard error of the density ( $D$ ) is 0.1858 individuals/km<sup>2</sup>.

## Section S4

### R codes for bootstrapping

```
# Load necessary libraries

library(boot)

library(readr)

# Load necessary libraries

library(boot)

library(readr)

library(dplyr)

# Read the data from the CSV file

data <- read_csv("density2.csv")

# Read the data from the CSV file

data <- read_csv("path/to/your/density2.csv")

# Define the statistic function to calculate the mean encounter rate

statistic_function <- function(data, indices) {

  # Resample the data with replacement

  resampled_data <- data[indices, ]

  # Calculate and return the mean encounter rate

  mean(resampled_data$`encounter rate`)

}

# Perform bootstrapping with 10000 replicates

bootstrap_results <- boot(data, statistic = statistic_function, R = 10000)
```



```

# Print the bootstrap results
print(bootstrap_results)

# Estimate the variance of the encounter rate
bootstrap_variance <- var(bootstrap_results$t)
cat("Estimated variance of the encounter rate:", bootstrap_variance, "\n")m


# Load necessary libraries
library(boot)
library(readr)


# Read the data from the CSV file
data <- read_csv("density.csv")

# Load necessary libraries
library(boot)
library(readr)
library(dplyr)


# Read the data from the CSV file after removing the Speed column
data <- read_csv("/path/to/your/data.csv") %>%
  select(Radius, Angle) # Select only the columns of interest


# Define a statistic function for the radius
statistic_function_radius <- function(data, indices) {

```

```
resampled_data <- data[indices, ]  
  
mean(resampled_data$Radius) # Replace 'Radius' with the actual column name for  
radius in your dataset  
}
```

```
# Define a statistic function for the angle  
statistic_function_angle <- function(data, indices) {  
  
  resampled_data <- data[indices, ]  
  
  mean(resampled_data$Angle) # Replace 'Angle' with the actual column name for  
angle in your dataset  
}
```

```
# Perform bootstrapping for the radius  
bootstrap_results_radius <- boot(data, statistic = statistic_function_radius, R = 10000)
```

```
# Perform bootstrapping for the angle  
bootstrap_results_angle <- boot(data, statistic = statistic_function_angle, R = 10000)
```

```
# Print the bootstrap results for radius  
print(bootstrap_results_radius)
```

```
# Print the bootstrap results for angle  
print(bootstrap_results_angle)
```

```
# Estimate and print the variance for the radius
```

```
bootstrap_variance_radius <- var(bootstrap_results_radius$t)
cat("Estimated variance of the detection radius:", bootstrap_variance_radius, "\n")
```

```
# Estimate and print the variance for the angle
```

```
bootstrap_variance_angle <- var(bootstrap_results_angle$t)
cat("Estimated variance of the detection angle:", bootstrap_variance_angle, "\n")
```

```
# Load necessary libraries
```

```
library(readr)
```

```
library(boot)
```

```
library(readr)
```

```
library(dplyr)
```

```
# Read the data from the CSV file
```

```
data <- read_csv("speed.csv")
```

```
# Read the speed data from the CSV file
```

```
data <- read_csv("speed.csv")
```

```
# Check the first few rows of the speed data to confirm it's loaded correctly
```

```
head(data)
```

```
# Define a statistic function for speed
```

```
statistic_function_speed <- function(data, indices) {
```

```
# Resample the data with replacement
resampled_data <- data[indices, ]

# Calculate and return the mean speed
mean(resampled_data$speed) # Make sure 'speed' matches the column name in your
CSV
}
```

```
# Perform bootstrapping for the speed
bootstrap_results_speed <- boot(data, statistic = statistic_function_speed, R = 10000)
```

```
# Print the bootstrap results for speed
print(bootstrap_results_speed)
```

```
# Estimate and print the variance for the speed
bootstrap_variance_speed <- var(bootstrap_results_speed$t)
cat("Estimated variance of the speed:", bootstrap_variance_speed, "\n")
```

## Section S5

### Executing: Exploratory Regression

Extract\_shp2 Encounter rateEUCALIDEAN DISTANCE TO BUILT IN  
AREAS;Altitude;Forest\_cover;Aspect;Slope;Roughness # # # 6 1 0.3 0.05 7.5 0.1  
0.1

Start Time: Fri Apr 5 06:22:25 2024

Running script ExploratoryRegression...

\*\*\*\*\*  
\*

Choose 1 of 6 Summary

Highest Adjusted R-Squared Results

| AdjR2 | AICc  | JB   | K(BP) | VIF  | SA   | Model                                    |
|-------|-------|------|-------|------|------|------------------------------------------|
| 0.49  | -6.64 | 0.48 | 0.22  | 1.00 | 0.65 | -ALTITUDE***                             |
| 0.24  | 2.24  | 0.39 | 0.06  | 1.00 | 0.72 | -EUCALIDEAN DISTANCE TO BUILT IN AREAS** |
| 0.13  | 5.36  | 0.42 | 0.01  | 1.00 | 0.69 | +FOREST_COVER***                         |

Passing Models

| AdjR2    | AICc      | JB       | K(BP)    | VIF      | SA       | Model        |
|----------|-----------|----------|----------|----------|----------|--------------|
| 0.485819 | -6.635059 | 0.481256 | 0.221983 | 1.000000 | 0.653428 | -ALTITUDE*** |

\*\*\*\*\*  
\*

Choose 2 of 6 Summary

Highest Adjusted R-Squared Results

| AdjR2 | AICc  | JB   | K(BP) | VIF  | SA   | Model                                                     |
|-------|-------|------|-------|------|------|-----------------------------------------------------------|
| 0.58  | -9.48 | 0.97 | 0.11  | 1.00 | 0.44 | -ALTITUDE*** -ASPECT**                                    |
| 0.57  | -8.68 | 0.50 | 0.58  | 1.12 | 0.61 | -EUCALIDEAN DISTANCE TO BUILT IN AREAS** -<br>ALTITUDE*** |
| 0.55  | -8.01 | 0.41 | 0.38  | 1.01 | 0.88 | -ALTITUDE*** -ROUGHNESS*                                  |

Passing Models

| AdjR2    | AICc      | JB       | K(BP)    | VIF      | SA       | Model                                                        |
|----------|-----------|----------|----------|----------|----------|--------------------------------------------------------------|
| 0.580568 | -9.482647 | 0.968810 | 0.109898 | 1.004023 | 0.440121 | -ALTITUDE*** -<br>ASPECT**                                   |
| 0.565598 | -8.676053 | 0.497510 | 0.577306 | 1.121692 | 0.611096 | -EUCALIDEAN DISTANCE<br>TO BUILT IN AREAS** -ALTITUDE***     |
| 0.360897 | 0.204113  | 0.343788 | 0.184150 | 1.006418 | 0.364702 | -EUCALIDEAN DISTANCE<br>TO BUILT IN AREAS*** +FOREST_COVER** |

\*\*\*\*\*  
\*

Choose 3 of 6 Summary

Highest Adjusted R-Squared Results

| AdjR2 | AICc  | JB   | K(BP) | VIF  | SA   | Model                                                                    |
|-------|-------|------|-------|------|------|--------------------------------------------------------------------------|
| 0.63  | -9.96 | 0.74 | 0.90  | 1.17 | 0.25 | -EUCALIDEAN DISTANCE TO BUILT IN AREAS** -<br>ALTITUDE*** +FOREST_COVER* |
| 0.62  | -9.93 | 0.53 | 0.44  | 1.19 | 0.41 | -EUCALIDEAN DISTANCE TO BUILT IN AREAS* -<br>ALTITUDE*** -ASPECT*        |
| 0.62  | -9.81 | 0.19 | 0.81  | 1.13 | 0.62 | -EUCALIDEAN DISTANCE TO BUILT IN AREAS** -<br>ALTITUDE*** -ROUGHNESS*    |

Passing Models

| AdjR2 | AICc | JB | K(BP) | VIF | SA | Model |
|-------|------|----|-------|-----|----|-------|
|-------|------|----|-------|-----|----|-------|

\*\*\*\*\*  
\*

Choose 4 of 6 Summary

Highest Adjusted R-Squared Results

| AdjR2                                | AICc  | JB   | K(BP) | VIF  | SA   | Model                                      |
|--------------------------------------|-------|------|-------|------|------|--------------------------------------------|
| 0.66                                 | -9.69 | 0.32 | 0.97  | 1.21 | 0.31 | -EUCALIDEAN DISTANCE TO BUILT IN AREAS* -  |
| ALTITUDE*** +FOREST_COVER -ASPECT    |       |      |       |      |      |                                            |
| 0.64                                 | -8.69 | 0.15 | 0.91  | 1.21 | 0.37 | -EUCALIDEAN DISTANCE TO BUILT IN AREAS** - |
| ALTITUDE*** +FOREST_COVER -ROUGHNESS |       |      |       |      |      |                                            |
| 0.64                                 | -8.17 | 0.08 | 0.76  | 1.19 | 0.42 | -EUCALIDEAN DISTANCE TO BUILT IN AREAS** - |
| ALTITUDE*** +FOREST_COVER* -SLOPE    |       |      |       |      |      |                                            |

Passing Models

| AdjR2 | AICc | JB | K(BP) | VIF | SA | Model |
|-------|------|----|-------|-----|----|-------|
|-------|------|----|-------|-----|----|-------|

\*\*\*\*\*  
\*

Choose 5 of 6 Summary

Highest Adjusted R-Squared Results

| AdjR2                                        | AICc  | JB   | K(BP) | VIF  | SA   | Model                                      |
|----------------------------------------------|-------|------|-------|------|------|--------------------------------------------|
| 0.65                                         | -5.98 | 0.11 | 0.93  | 1.64 | 0.37 | -EUCALIDEAN DISTANCE TO BUILT IN AREAS* -  |
| ALTITUDE*** +FOREST_COVER -ASPECT -ROUGHNESS |       |      |       |      |      |                                            |
| 0.65                                         | -5.82 | 0.07 | 0.80  | 1.48 | 0.37 | -EUCALIDEAN DISTANCE TO BUILT IN AREAS* -  |
| ALTITUDE*** +FOREST_COVER -ASPECT -SLOPE     |       |      |       |      |      |                                            |
| 0.62                                         | -4.51 | 0.10 | 0.87  | 3.48 | 0.39 | -EUCALIDEAN DISTANCE TO BUILT IN AREAS** - |
| ALTITUDE*** +FOREST_COVER -SLOPE -ROUGHNESS  |       |      |       |      |      |                                            |

Passing Models

| AdjR2 | AICc | JB | K(BP) | VIF | SA | Model |
|-------|------|----|-------|-----|----|-------|
|-------|------|----|-------|-----|----|-------|

\*\*\*\*\*  
\*

Choose 6 of 6 Summary

Highest Adjusted R-Squared Results

| AdjR2                                               | AICc  | JB   | K(BP) | VIF  | SA   | Model                                     |
|-----------------------------------------------------|-------|------|-------|------|------|-------------------------------------------|
| 0.63                                                | -1.17 | 0.08 | 0.89  | 3.77 | 0.37 | -EUCALIDEAN DISTANCE TO BUILT IN AREAS* - |
| ALTITUDE*** +FOREST_COVER -ASPECT -SLOPE -ROUGHNESS |       |      |       |      |      |                                           |

Passing Models

| AdjR2 | AICc | JB | K(BP) | VIF | SA | Model |
|-------|------|----|-------|-----|----|-------|
|-------|------|----|-------|-----|----|-------|

\*\*\*\*\*  
\*

\*\*\*\*\* Exploratory Regression Global Summary (ENCOUNTE\_1)

\*\*\*\*\*

Percentage of Search Criteria Passed

| Search Criterion                    | Cutoff | Trials # | Passed | % Passed |
|-------------------------------------|--------|----------|--------|----------|
| Min Adjusted R-Squared              | > 0.30 | 63       | 39     | 61.90    |
| Max Coefficient p-value             | < 0.05 | 63       | 6      | 9.52     |
| Max VIF Value                       | < 7.50 | 63       | 63     | 100.00   |
| Min Jarque-Bera p-value             | > 0.10 | 63       | 59     | 93.65    |
| Min Spatial Autocorrelation p-value | > 0.10 | 19       | 19     | 100.00   |

-----  
-

Summary of Variable Significance

| Variable                              | % Significant | % Negative | % Positive |
|---------------------------------------|---------------|------------|------------|
| ALTITUDE                              | 100.00        | 100.00     | 0.00       |
| EUCALIDEAN DISTANCE TO BUILT IN AREAS |               | 71.88      | 100.00     |
| FOREST_COVER                          | 40.62         | 0.00       | 100.00     |

|           |      |        |       |
|-----------|------|--------|-------|
| ASPECT    | 3.12 | 100.00 | 0.00  |
| SLOPE     | 0.00 | 84.38  | 15.62 |
| ROUGHNESS | 0.00 | 87.50  | 12.50 |

-----

-

Summary of Multicollinearity

| Variable                              | VIF  | Violations | Covariates |
|---------------------------------------|------|------------|------------|
| EUCALIDEAN DISTANCE TO BUILT IN AREAS | 1.20 | 0          | -----      |
| ALTITUDE                              | 1.22 | 0          | -----      |
| FOREST_COVER                          | 1.25 | 0          | -----      |
| ASPECT                                | 1.60 | 0          | -----      |
| SLOPE                                 | 3.21 | 0          | -----      |
| ROUGHNESS                             | 3.77 | 0          | -----      |

-----

-

Summary of Residual Normality (JB)

| JB                     | AdjR2    | AICc      | K(BP)    | VIF      | SA       | Model                |
|------------------------|----------|-----------|----------|----------|----------|----------------------|
| 0.968810               | 0.580568 | -9.482647 | 0.109898 | 1.004023 | 0.440121 | -ALTITUDE*** -       |
| ASPECT**               |          |           |          |          |          |                      |
| 0.795632               | 0.566802 | -6.612457 | 0.168658 | 1.390896 | 0.489425 | -ALTITUDE*** -ASPECT |
| -SLOPE                 |          |           |          |          |          |                      |
| 0.755707               | 0.606242 | -8.807984 | 0.398001 | 1.100194 | 0.385144 | -ALTITUDE***         |
| +FOREST_COVER -ASPECT* |          |           |          |          |          |                      |

-----

-

Summary of Residual Spatial Autocorrelation (SA)

| SA                  | AdjR2    | AICc      | JB       | K(BP)    | VIF      | Model                |
|---------------------|----------|-----------|----------|----------|----------|----------------------|
| 0.877411            | 0.552815 | -8.009029 | 0.407752 | 0.377780 | 1.005550 | -ALTITUDE*** -       |
| ROUGHNESS*          |          |           |          |          |          |                      |
| 0.719599            | 0.243809 | 2.236474  | 0.391899 | 0.061031 | 1.000000 | -EUCALIDEAN DISTANCE |
| TO BUILT IN AREAS** |          |           |          |          |          |                      |
| 0.692350            | 0.133830 | 5.359599  | 0.422079 | 0.013044 | 1.000000 | +FOREST_COVER***     |

-----

-

Table Abbreviations

AdjR2 Adjusted R-Squared

AICc Akaike's Information Criterion

JB Jarque-Bera p-value

K(BP) Koenker (BP) Statistic p-value

VIF Max Variance Inflation Factor

SA Global Moran's I p-value

Model Variable sign (+/-)

Model Variable significance (\* = 0.10; \*\* = 0.05; \*\*\* = 0.01)

-----

-

Completed script ExploratoryRegression...

Succeeded at Fri Apr 5 06:22:25 2024 (Elapsed Time: 0.44 seconds)

The output of the Exploratory Regression analysis in ArcGIS 10.8 provided a comprehensive summary of the relationships between the dependent variable (bears encounter rates) and the explanatory variables (Euclidean distance to built-in areas, altitude, forest cover, aspect, slope, and roughness). Here's a breakdown of the key results:

#### **1. Model Selection and Significance:**

- ❖ The highest Adjusted R-Squared value is 0.66, suggesting that the model with Euclidean distance to built-in areas, altitude, forest cover, and aspect explains 66% of the variance in bear encounter rates.
- ❖ Altitude is significant in all models (100% significant, always negative), indicating a strong and consistent negative relationship with bear encounter rates.
- ❖ Euclidean distance to built-in areas is significant in 71.88% of the models, also showing a negative relationship with bear encounter rates.
- ❖ Forest cover is significant in 40.62% of the models, with a positive relationship with bear encounter rates.
- ❖ Aspect is significant in a small percentage of models (3.12%), with a negative relationship.
- ❖ Slope and roughness are not significant in any of the models.

#### **2. Multicollinearity:**

- ❖ The Variance Inflation Factor (VIF) values for all variables are below the threshold of 7.5, indicating that multicollinearity is not a concern in these models.

#### **3. Residual Normality and Spatial Autocorrelation:**

- ❖ The Jarque-Bera (JB) p-values and Global Moran's I (SA) p-values suggest that the residuals are generally normally distributed and do not exhibit significant spatial autocorrelation, which is desirable for a well-specified model.

#### **4. Best Models:**



- ❖ The best models based on Adjusted R-Squared include combinations of altitude, aspect, Euclidean distance to built-in areas, and forest cover.

#### 5. **Recommendations:**

- ❖ Based on these results, altitude appears to be the most important factor negatively associated with bear encounter rates. Efforts to manage bear populations and reduce human-bear conflicts may need to consider the influence of altitude on bear distribution.
- ❖ The significance of Euclidean distance to built-in areas suggests that proximity to human development may also impact bear encounter rates.
- ❖ The positive association with forest cover indicates that bears may prefer low land Quercus Forest areas, which could inform habitat conservation and management strategies.
